# Supplementary material
Source: publisher figshare collection journal article supplement (https://acs.figshare.com/ndownloader/files/3865177)
Supplement: Supplementary file 1 [file 3865177]

## ***Supporting Information***

### **Co-Assembled Conductive Hydrogel of N-fluorenylmethoxycarbonyl Phenylalanine with Polyaniline**

Priyadarshi Chakraborty, Partha Bairi, Sanjoy Mondal and Arun K. Nandi\*

Polymer Science Unit,

Indian Association for the Cultivation of Science, Jadavpur

Kolkata-700 032, INDIA

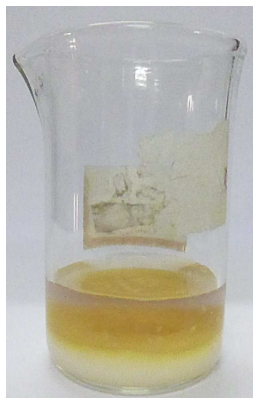

Gel after addition  
of APS

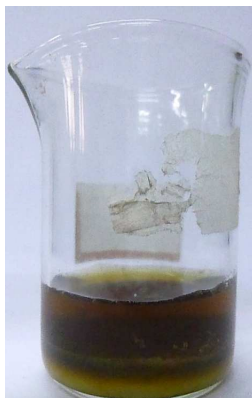

After 1 hour of  
APS addition

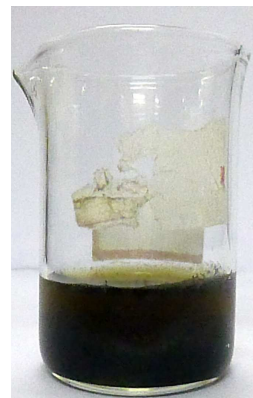

After 24 hour of  
APS addition

Figure S1 Steps of aniline polymerization using APS

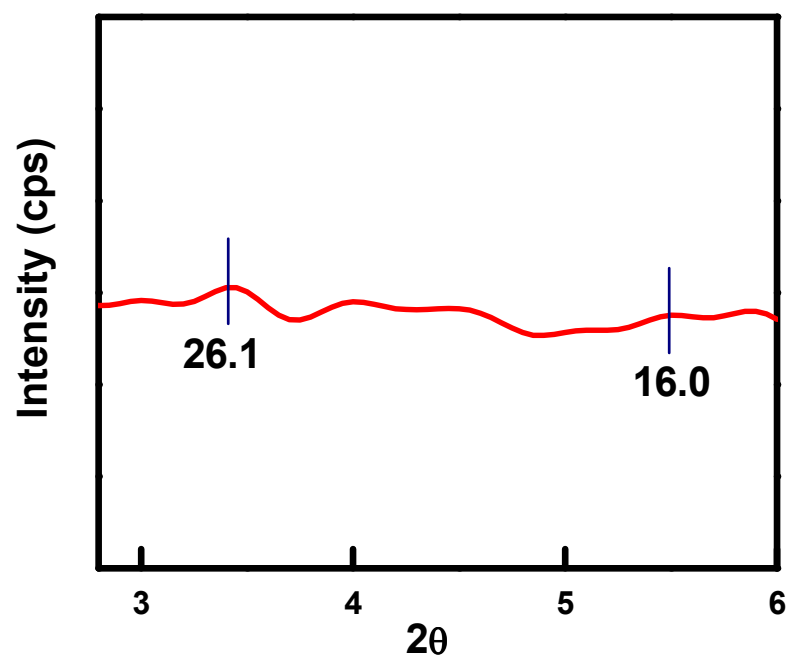

Figure S2. Enlarged XRD pattern of the **FP-ANI** xerogel in the range of  $2\theta = 3$  to 6

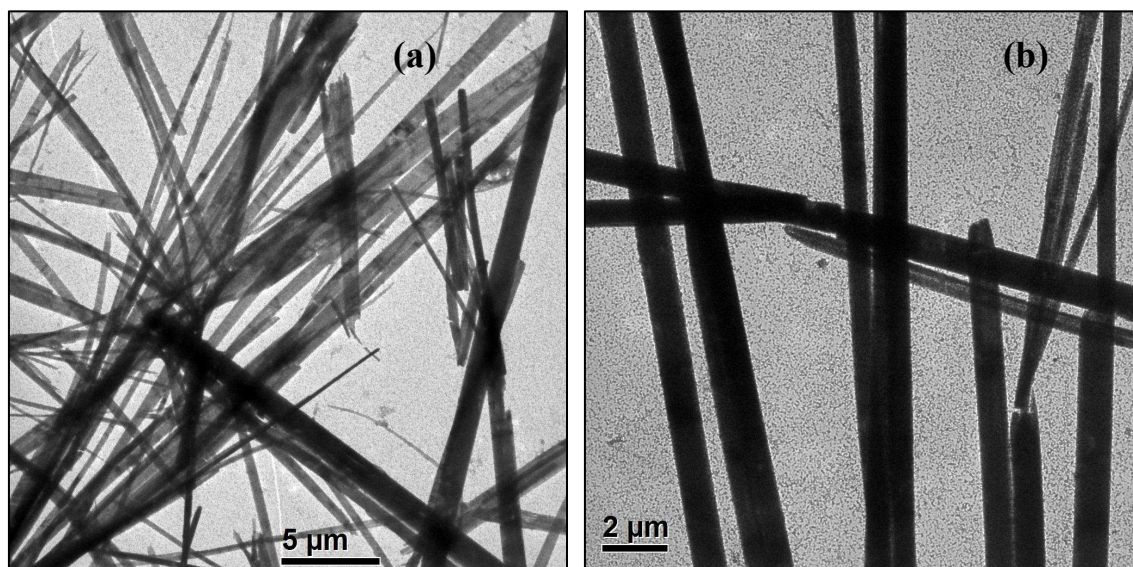

Figure S3. TEM images of the **FP** assembly

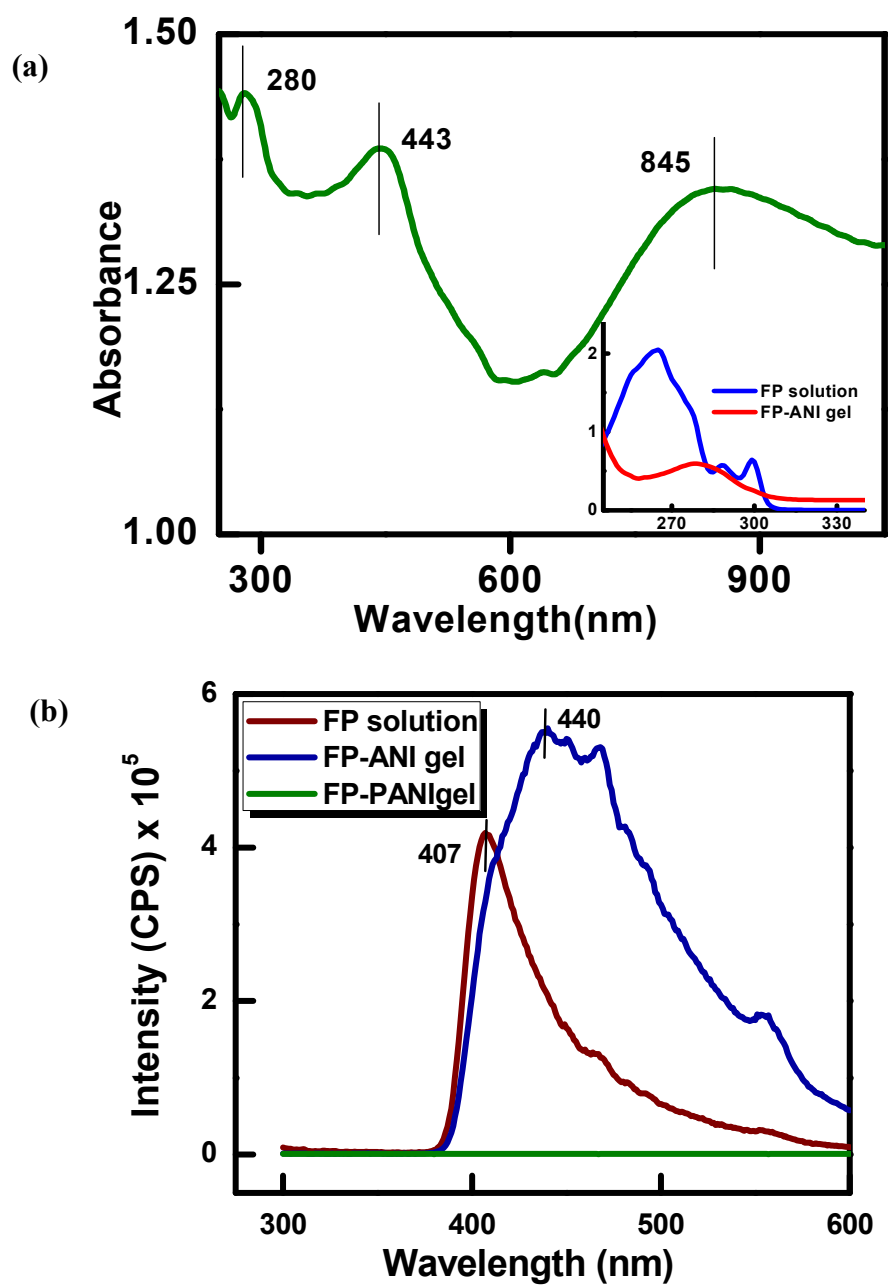

Figure S4 (a) UV-vis spectra of aqueous dispersion of **FP-PANI** gel. (Inset: UV-vis spectra of **FP** solution and diluted **FP-ANI** gel) (b) Fluorescence spectra of **FP** solution, **FP-ANI** and **FP-PANI** gels.

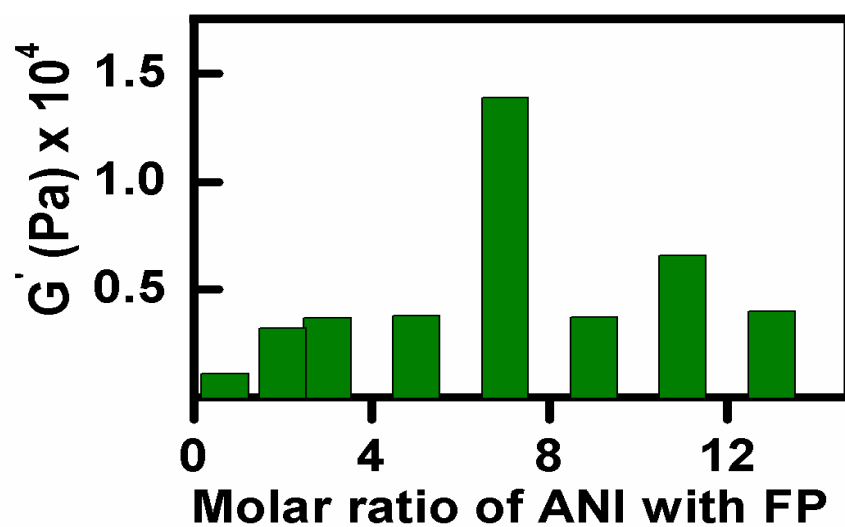

Figure S5. Bar diagram of  $G'$  values of gels after polymerization for different molar concentration of ANI.
